# Supplementary material
Source: PubMed Central journal article supplement (PMC8190773)
Supplement: NIHMS1033682-supplement-1.pdf [file NIHMS1033682-supplement-1.pdf]

Supplementary table 1. A list of fluoroscopically guided interventional (FGI) procedures from the detailed FGI procedures work history survey and purpose of the procedures.

---

**Diagnostic procedures**

Diagnostic cardiovascular catheterizations  
Electrophysiology (EP) diagnostic studies  
Diagnostic neuroangiography

**Therapeutic procedures**

Percutaneous coronary interventions (PCI)  
Electrophysiology (EP) ablations  
Pacemaker or intracardiac defibrillator implantations  
Embolizations  
Endovascular therapeutic procedures  
Peripherally inserted central catheter (PICC) placement  
Dialysis interventions  
Peripheral vascular interventions  
Transjugular intrahepatic portosystemic shunts (TIPS)  
Port placement  
Inferior Vena Cava (IVC) filter placement  
Aortic stent grafts  
Percutaneous nephrolithotomy (PCNL)  
Nephrostomy  
Biliary tract procedures  
Endoscopic retrograde cholangiopancreatography (ERCP)  
Vertebroplasty  
Orthopedic extremity nailing

---
